# Supplementary material for: Association analysis of 10 candidate genes causing Mendelian calcium nephrolithiasis in the INCIPE study: a South European general population cohort
Source: PubMed Central journal article supplement — Clin Kidney J. 2023 Jan 23;16(3):521–7. doi: 10.1093/ckj/sfac225 (PMC9972819; doi:10.1093/ckj/sfac225), 2023-01-23
Supplement: sfac225_supplemental_file.pdf [file sfac225_supplemental_file.pdf]

**Supplementary Table 1. Continuous and categorical variables investigated for the association of history of kidney stones**

| <b>Stone History</b>    | <b>Investigated variable</b> |
|-------------------------|------------------------------|
| Age                     | Covariate                    |
| Glucose (plasma)        | Covariate                    |
| Urea (plasma)           | Covariate                    |
| eGFR (CKD_EPI)          | Covariate                    |
| Uric acid (plasma)      | Covariate                    |
| Cholesterol             | Covariate                    |
| Tryglicerides           | Covariate                    |
| Cholesterol HDL         | Covariate                    |
| Cholesterol LDL         | Covariate                    |
| Albumin (plasma)        | Covariate                    |
| ACR (urine)             | Covariate                    |
| Weight                  | Covariate                    |
| Height                  | Covariate                    |
| Abdominal circumference | Covariate                    |
| Gluteal circumference   | Covariate                    |
| BMI                     | Covariate                    |
| BSA                     | Covariate                    |
| Insulin                 | Covariate                    |
| Na (plasma)             | Covariate                    |
| K (plasma)              | Covariate                    |
| Cl (plasma)             | Covariate                    |
| Ca (plasma)             | Covariate                    |
| Phosphate (plasma)      | Covariate                    |
| hsCRP                   | Covariate                    |
| Cystatin_C (plasma)     | Covariate                    |

|                                  |           |
|----------------------------------|-----------|
| Creatinine (plasma)              | Covariate |
| Systolic BP                      | Covariate |
| Diastolic BP                     | Covariate |
| CKD_stage                        | Covariate |
| Q: Hypertension                  | Covariate |
| Q: Drugs for hypertension        | Covariate |
| Q: Previous/known renal diseases | Covariate |
| Q: Renal diseases in the family  | Covariate |
| MS                               | Covariate |
| Gender                           | Covariate |

Legend: ACR, albumin/creatinine ratio; BP, blood pressure; BSA, body surface area; hsCRP, high sensitivity C reactive protein; MS, Metabolic syndrome; Q: question on;

**Supplementary Table 2. Variants of candidate genes associated with stone history**

**INCIPE 1**

| MARKER |           |     |     |             |        |          | SH  |     |     | NSH |     |     |
|--------|-----------|-----|-----|-------------|--------|----------|-----|-----|-----|-----|-----|-----|
| CHR    | POS       | REF | ALT | RSCODE      | CLNSIG | GENE     | 0/0 | 0/1 | 1/1 | 0/0 | 0/1 | 1/1 |
| chr1   | 180634486 | G   | A   | rs138879807 | -      | XPR1     | 124 | 7   | 0   | 750 | 12  | 0   |
| chr1   | 180646152 | G   | A   | rs3903981   | -      | XPR1     | 3   | 31  | 97  | 26  | 250 | 486 |
| chr1   | 180669434 | G   | A   | rs145177695 | -      | XPR1     | 125 | 6   | 0   | 691 | 71  | 0   |
| chr1   | 180723190 | C   | T   | rs12040223  | -      | XPR1     | 124 | 7   | 0   | 748 | 14  | 0   |
| chr1   | 180742802 | T   | C   | rs2331753   | -      | XPR1     | 3   | 33  | 95  | 26  | 249 | 487 |
| chr1   | 180769656 | G   | A   | rs114197278 | -      | XPR1     | 124 | 7   | 0   | 750 | 12  | 0   |
| chr1   | 180777554 | A   | G   | rs116112940 | -      | XPR1     | 125 | 6   | 0   | 686 | 76  | 0   |
| chr1   | 180846345 | A   | G   | rs72707405  | -      | XPR1     | 95  | 33  | 3   | 489 | 247 | 26  |
| chr1   | 180851586 | C   | A   | rs116688930 | -      | XPR1     | 125 | 6   | 0   | 687 | 75  | 0   |
| chr1   | 180851588 | A   | T   | rs114203991 | -      | XPR1     | 125 | 6   | 0   | 687 | 75  | 0   |
| chr1   | 180866104 | C   | T   | rs138447792 | -      | XPR1     | 124 | 7   | 0   | 749 | 13  | 0   |
| chr1   | 180873358 | A   | C   | rs75831517  | -      | XPR1     | 127 | 4   | 0   | 705 | 57  | 0   |
| chr7   | 138714582 | A   | C   | rs3080494   | -      | ATP6V0A4 | 89  | 39  | 3   | 584 | 165 | 13  |
| chr7   | 138716422 | T   | C   | rs6943456   | -      | ATP6V0A4 | 87  | 39  | 5   | 563 | 180 | 19  |
| chr7   | 138724665 | A   | G   | rs7808193   | -      | ATP6V0A4 | 86  | 40  | 5   | 563 | 180 | 19  |
| chr7   | 138725596 | T   | C   | rs34587733  | -      | ATP6V0A4 | 86  | 40  | 5   | 565 | 178 | 19  |

|      |           |   |   |            |        |          |     |    |    |     |     |     |
|------|-----------|---|---|------------|--------|----------|-----|----|----|-----|-----|-----|
| chr7 | 138726967 | T | C | rs6973199  | -      | ATP6V0A4 | 89  | 37 | 5  | 579 | 165 | 18  |
| chr7 | 138726981 | G | C | rs34093718 | -      | ATP6V0A4 | 110 | 21 | 0  | 704 | 54  | 4   |
| chr7 | 138730130 | C | T | rs1809086  | -      | ATP6V0A4 | 43  | 59 | 29 | 289 | 380 | 93  |
| chr7 | 138730334 | C | T | rs896191   | -      | ATP6V0A4 | 8   | 38 | 85 | 64  | 317 | 381 |
| chr7 | 138730386 | G | A | rs896190   | -      | ATP6V0A4 | 8   | 38 | 85 | 65  | 325 | 372 |
| chr7 | 138730482 | G | A | rs1473390  | -      | ATP6V0A4 | 78  | 48 | 5  | 535 | 202 | 25  |
| chr7 | 138730939 | A | T | rs2353838  | -      | ATP6V0A4 | 6   | 33 | 92 | 45  | 289 | 428 |
| chr7 | 138731410 | G | A | rs72611547 | -      | ATP6V0A4 | 35  | 60 | 36 | 242 | 386 | 134 |
| chr7 | 138732592 | G | A | rs3778694  | -      | ATP6V0A4 | 33  | 62 | 36 | 240 | 386 | 136 |
| chr7 | 138732973 | A | G | rs3807154  | Benign | ATP6V0A4 | 7   | 39 | 85 | 58  | 321 | 383 |
| chr7 | 138735214 | A | G | rs2122664  | -      | ATP6V0A4 | 5   | 28 | 98 | 24  | 257 | 481 |
| chr7 | 138742075 | T | C | rs10249244 | -      | ATP6V0A4 | 82  | 43 | 6  | 528 | 220 | 14  |
| chr7 | 138745470 | A | G | rs35974644 | -      | ATP6V0A4 | 109 | 22 | 0  | 700 | 59  | 3   |
| chr7 | 138748254 | A | C | rs4728445  | -      | ATP6V0A4 | 73  | 49 | 9  | 497 | 241 | 24  |
| chr7 | 138748438 | G | A | rs4732328  | -      | ATP6V0A4 | 73  | 49 | 9  | 497 | 241 | 24  |
| chr7 | 138748761 | A | C | rs7781292  | -      | ATP6V0A4 | 73  | 48 | 10 | 484 | 253 | 25  |
| chr7 | 138748801 | C | T | rs61392013 | -      | ATP6V0A4 | 116 | 14 | 1  | 707 | 55  | 0   |
| chr7 | 138749740 | T | C | rs366193   | -      | ATP6V0A4 | 17  | 56 | 58 | 131 | 367 | 264 |
| chr7 | 138750001 | T | C | rs367253   | -      | ATP6V0A4 | 52  | 57 | 22 | 348 | 329 | 85  |
| chr7 | 138751070 | A | C | rs451054   | -      | ATP6V0A4 | 17  | 57 | 57 | 133 | 370 | 259 |

|       |           |     |   |             |   |          |     |    |    |     |     |     |
|-------|-----------|-----|---|-------------|---|----------|-----|----|----|-----|-----|-----|
| chr7  | 138751122 | A   | G | rs390798    | - | ATP6V0A4 | 17  | 57 | 57 | 132 | 371 | 259 |
| chr7  | 138752135 | T   | C | rs427031    | - | ATP6V0A4 | 11  | 60 | 60 | 107 | 357 | 298 |
| chr7  | 138752241 | G   | T | rs441528    | - | ATP6V0A4 | 17  | 57 | 57 | 133 | 372 | 257 |
| chr7  | 138752389 | C   | G | rs28491851  | - | ATP6V0A4 | 17  | 56 | 58 | 133 | 371 | 258 |
| chr7  | 138753694 | C   | G | rs423184    | - | ATP6V0A4 | 17  | 56 | 58 | 132 | 373 | 257 |
| chr7  | 138753772 | T   | A | rs453407    | - | ATP6V0A4 | 17  | 55 | 59 | 132 | 372 | 258 |
| chr7  | 138754103 | T   | C | rs411467    | - | ATP6V0A4 | 52  | 57 | 22 | 350 | 327 | 85  |
| chr7  | 138756379 | A   | G | rs296910    | - | ATP6V0A4 | 17  | 53 | 61 | 130 | 365 | 267 |
| chr7  | 138757851 | T   | C | rs296909    | - | ATP6V0A4 | 17  | 54 | 60 | 130 | 365 | 267 |
| chr7  | 138766325 | C   | T | rs34665778  | - | ATP6V0A4 | 112 | 19 | 0  | 708 | 52  | 2   |
| chr7  | 138773192 | G   | A | rs35336496  | - | ATP6V0A4 | 113 | 18 | 0  | 710 | 51  | 1   |
| chr7  | 138783773 | G   | A | rs11974755  | - | ATP6V0A4 | 118 | 13 | 0  | 636 | 116 | 10  |
| chr8  | 42483325  | C   | T | rs112844178 | - | SCL20A2  | 125 | 6  | 0  | 662 | 99  | 1   |
| chr8  | 42487905  | C   | T | rs117673501 | - | SCL20A2  | 124 | 7  | 0  | 744 | 18  | 0   |
| chr8  | 42489432  | C   | T | rs117173054 | - | SCL20A2  | 132 | 8  | 0  | 743 | 19  | 0   |
| chr8  | 42489510  | T   | C | rs57699438  | - | SCL20A2  | 123 | 8  | 0  | 741 | 21  | 0   |
| chr8  | 42490887  | CTT | C | rs146551698 | - | SCL20A2  | 123 | 8  | 0  | 740 | 22  | 0   |
| chr8  | 42503375  | C   | T | rs74857652  | - | SCL20A2  | 130 | 1  | 0  | 720 | 39  | 3   |
| chr12 | 4374636   | C   | T | rs10774226  | - | FGF23    | 2   | 46 | 83 | 41  | 285 | 436 |
| chr20 | 54161174  | G   | A | rs2585440   | - | CYP24A1  | 119 | 11 | 1  | 719 | 43  | 0   |

|       |          |       |   |             |   |         |     |    |    |     |     |     |
|-------|----------|-------|---|-------------|---|---------|-----|----|----|-----|-----|-----|
| chr20 | 54163591 | ACC   | A | rs148328441 | - | CYP24A1 | 120 | 11 | 0  | 731 | 31  | 0   |
| chr20 | 54164712 | G     | C | rs2762939   | - | CYP24A1 | 67  | 55 | 9  | 456 | 269 | 37  |
| chr20 | 54165160 | C     | T | rs76151159  | - | CYP24A1 | 120 | 11 | 0  | 732 | 30  | 0   |
| chr20 | 54165411 | A     | C | rs2762940   | - | CYP24A1 | 67  | 55 | 9  | 455 | 270 | 37  |
| chr20 | 54165489 | T     | C | rs76966109  | - | CYP24A1 | 120 | 11 | 0  | 732 | 30  | 0   |
| chr20 | 54165512 | A     | G | rs2585429   | - | CYP24A1 | 39  | 60 | 32 | 286 | 361 | 115 |
| chr20 | 54166666 | A     | C | rs78851953  | - | CYP24A1 | 124 | 7  | 0  | 745 | 17  | 0   |
| chr20 | 54167770 | CAAAT | C | rs5841977   | - | CYP24A1 | 61  | 56 | 14 | 421 | 291 | 50  |
| chr20 | 54168073 | T     | C | rs2585431   | - | CYP24A1 | 15  | 55 | 61 | 112 | 374 | 276 |
| chr20 | 54170763 | A     | G | rs13038432  | - | CYP24A1 | 120 | 11 | 0  | 633 | 126 | 3   |
| chr20 | 54171755 | C     | A | rs36106327  | - | CYP24A1 | 119 | 12 | 0  | 734 | 28  | 0   |
| chr20 | 54172103 | A     | G | rs79276611  | - | CYP24A1 | 119 | 12 | 0  | 730 | 32  | 0   |
| chr20 | 54173157 | G     | A | rs35792925  | - | CYP24A1 | 119 | 12 | 0  | 730 | 32  | 0   |

## INCIPE 2

| MARKER |           |     |     |             |        |      | SH  |     |     | NSH  |     |     |
|--------|-----------|-----|-----|-------------|--------|------|-----|-----|-----|------|-----|-----|
| CHR    | POS       | REF | ALT | RSCODE      | CLNSIG | GENE | 0/0 | 0/1 | 1/1 | 0/0  | 0/1 | 1/1 |
| chr1   | 180631083 | G   | T   | rs3819952   | -      | XPR1 | 208 | 36  | 1   | 1414 | 347 | 30  |
| chr1   | 180631084 | C   | T   | rs3819951   | -      | XPR1 | 208 | 36  | 1   | 1414 | 347 | 30  |
| chr1   | 180706787 | A   | T   | rs535665609 | -      | XPR1 | 237 | 8   | 0   | 1762 | 29  | 0   |

|       |           |                        |   |             |        |          |     |     |     |      |     |     |
|-------|-----------|------------------------|---|-------------|--------|----------|-----|-----|-----|------|-----|-----|
| chr1  | 180848299 | C                      | T | rs145804446 | -      | XPR1     | 238 | 7   | 0   | 1762 | 29  | 0   |
| chr2  | 70957364  | T                      | G | rs56237258  | -      | ATP6V1B1 | 144 | 87  | 14  | 1120 | 604 | 67  |
| chr5  | 177386231 | GGTCCCCAAGCTGCGCCAGGCT | G | rs876661296 | Benign | SLC34A1  | 233 | 12  | 0   | 1738 | 53  | 0   |
| chr8  | 42473720  | C                      | G | rs140854316 | -      | SLC20A2  | 229 | 16  | 0   | 1721 | 68  | 2   |
| chr9  | 137233633 | T                      | C | rs28407527  | Benign | SLC34A3  | 91  | 123 | 31  | 585  | 871 | 335 |
| chr12 | 4376738   | C                      | T | rs13312762  | -      | FGF23    | 228 | 17  | 0   | 1727 | 63  | 1   |
| chr20 | 54162671  | G                      | T | rs6091828   | -      | CYP24A1  | 218 | 27  | 0   | 1679 | 111 | 1   |
| chr20 | 54163591  | ACC                    | A | rs148328441 | -      | CYP24A1  | 227 | 18  | 0   | 1708 | 83  | 0   |
| chr20 | 54164943  | C                      | T | rs76194329  | -      | CYP24A1  | 219 | 26  | 0   | 1678 | 112 | 1   |
| chr20 | 54165160  | C                      | T | rs76151159  | -      | CYP24A1  | 227 | 18  | 0   | 1708 | 83  | 0   |
| chr20 | 54165489  | T                      | C | rs76966109  | -      | CYP24A1  | 227 | 18  | 0   | 1708 | 83  | 0   |
| chr20 | 54168073  | T                      | C | rs2585431   | -      | CYP24A1  | 27  | 111 | 107 | 253  | 851 | 687 |
| chr20 | 54171755  | C                      | A | rs36106327  | -      | CYP24A1  | 227 | 18  | 0   | 1710 | 81  | 0   |
| chr20 | 54172103  | A                      | G | rs79276611  | -      | CYP24A1  | 225 | 20  | 0   | 1709 | 80  | 2   |
| chr20 | 54173157  | G                      | A | rs35792925  | -      | CYP24A1  | 225 | 20  | 0   | 1707 | 82  | 2   |

**Supplementary Table 3. Significant variants in INCIPE and already described in other papers**

|                |                                                                                                          | NSH (n. 3386)                                      |                                              | SH (n. 478)                                    |                                              |
|----------------|----------------------------------------------------------------------------------------------------------|----------------------------------------------------|----------------------------------------------|------------------------------------------------|----------------------------------------------|
|                | <b>Variants described by<br/>Halbritter et al. 2015<br/>Braun et al. 2016<br/>and observed in INCIPE</b> | <b>number of<br/>heterozygous subjects<br/>(%)</b> | <b>number of homozygous<br/>subjects (%)</b> | <b>number of heterozygous<br/>subjects (%)</b> | <b>number of homozygous<br/>subjects (%)</b> |
| <b>SLC34A1</b> | chr5:177386231:GGTCCCAA<br>GCTGCGCCAGGCT:G<br>rs876661296                                                | 53 (1.6)                                           | 0                                            | 12 (2.5)                                       | 0                                            |
| <b>CYP24A1</b> | chr20:54153445:C:T<br><a href="#">rs4811494</a>                                                          | 605 (17.9)                                         | 89 (2.6)                                     | 96 (20.1)                                      | 9 (1.9)                                      |

Jan Halbritter et al.: J Am Soc Nephrol 26: 543–551, 2015. doi: 10.1681/ASN.2014040388

Daniela Anne Braun et al.: Clin J Am Soc Nephrol 11: 664–672, 2016. doi: 10.2215/CJN.07540715



**Supplementary Table 4. Pathogenetic variants of chromosome 20**

| MARKER |          |           |     |         |             |                              | INCIPE1 SH |     |     | INCIPE1 NSH |     |     | INCIPE2 SH |     |     | INCIPE2 NSH |     |     | TOTAL SH |     |     | TOTAL NSH |     |     | TOTAL SH PERC |            |     | TOTAL NSH PERC |            |     |
|--------|----------|-----------|-----|---------|-------------|------------------------------|------------|-----|-----|-------------|-----|-----|------------|-----|-----|-------------|-----|-----|----------|-----|-----|-----------|-----|-----|---------------|------------|-----|----------------|------------|-----|
| CHR    | POS      | REF       | ALT | GENE    | RSCODE      | CLNSIG                       | 0/0        | 0/1 | 1/1 | 0/0         | 0/1 | 1/1 | 0/0        | 0/1 | 1/1 | 0/0         | 0/1 | 1/1 | 0/0      | 0/1 | 1/1 | 0/0       | 0/1 | 1/1 | 0/0           | 0/1        | 1/1 | 0/0            | 0/1        | 1/1 |
| chr20  | 54157426 | G         | A   | CYP24A1 | NA          | Pathogenic                   | 131        | 0   | 0   | 762         | 0   | 0   | 245        | 0   | 0   | 1791        | 0   | 0   | 376      | 0   | 0   | 2553      | 0   | 0   | 1             | 0          | 0   | 1              | 0          | 0   |
| chr20  | 54158135 | C         | T   | CYP24A1 | rs143934667 | Pathogenic                   | 131        | 0   | 0   | 762         | 0   | 0   | 245        | 0   | 0   | 1790        | 1   | 0   | 376      | 0   | 0   | 2552      | 1   | 0   | 1             | 0          | 0   | 0,9996083      | 0,0003917  | 0   |
| chr20  | 54158136 | G         | A   | CYP24A1 | rs114368325 | Pathogenic                   | 129        | 2   | 0   | 755         | 7   | 0   | 244        | 1   | 0   | 1781        | 10  | 0   | 373      | 3   | 0   | 2536      | 17  | 0   | 0,99202128    | 0,00797872 | 0   | 0,99334117     | 0,00665883 | 0   |
| chr20  | 54158967 | C         | G   | CYP24A1 | NA          | Pathogenic                   | 131        | 0   | 0   | 762         | 0   | 0   | 245        | 0   | 0   | 1791        | 0   | 0   | 376      | 0   | 0   | 2553      | 0   | 0   | 1             | 0          | 0   | 1              | 0          | 0   |
| chr20  | 54159075 | G         | A   | CYP24A1 | rs777947329 | Pathogenic/Likely_pathogenic | 131        | 0   | 0   | 762         | 0   | 0   | 245        | 0   | 0   | 1791        | 0   | 0   | 376      | 0   | 0   | 2553      | 0   | 0   | 1             | 0          | 0   | 1              | 0          | 0   |
| chr20  | 54159107 | ATTAGACTG | A   | CYP24A1 | rs770055617 | Pathogenic                   | 131        | 0   | 0   | 762         | 0   | 0   | 245        | 0   | 0   | 1791        | 0   | 0   | 376      | 0   | 0   | 2553      | 0   | 0   | 1             | 0          | 0   | 1              | 0          | 0   |
| chr20  | 54162743 | C         | T   | CYP24A1 | rs387907324 | Pathogenic                   | 131        | 0   | 0   | 762         | 0   | 0   | 245        | 0   | 0   | 1791        | 0   | 0   | 376      | 0   | 0   | 2553      | 0   | 0   | 1             | 0          | 0   | 1              | 0          | 0   |
| chr20  | 54173045 | CA        | C   | CYP24A1 | NA          | Pathogenic                   | 131        | 0   | 0   | 762         | 0   | 0   | 245        | 0   | 0   | 1791        | 0   | 0   | 376      | 0   | 0   | 2553      | 0   | 0   | 1             | 0          | 0   | 1              | 0          | 0   |
| chr20  | 54173517 | CG        | C   | CYP24A1 | rs774432244 | Pathogenic/Likely_pathogenic | 131        | 0   | 0   | 762         | 0   | 0   | 245        | 0   | 0   | 1791        | 0   | 0   | 376      | 0   | 0   | 2553      | 0   | 0   | 1             | 0          | 0   | 1              | 0          | 0   |
| chr20  | 54173577 | C         | A   | CYP24A1 | rs781367354 | Likely_pathogenic            | 131        | 0   | 0   | 762         | 0   | 0   | 245        | 0   | 0   | 1791        | 0   | 0   | 376      | 0   | 0   | 2553      | 0   | 0   | 1             | 0          | 0   | 1              | 0          | 0   |
